# Supplementary material
Source: publisher figshare collection journal article supplement (https://acs.figshare.com/ndownloader/files/28756942)
Supplement: Supplementary file 1 [file 28756942]

**Supporting information for:**

**Systematic Study of the Thermal Properties of**

**Zeolitic Frameworks**

Maxime Ducamp and François-Xavier Coudert\*

*Chimie ParisTech, PSL Research University, CNRS, Institut de Recherche de Chimie  
Paris, 75005 Paris, France*

E-mail: [fx.coudert@chimieparistech.psl.eu](mailto:fx.coudert@chimieparistech.psl.eu)

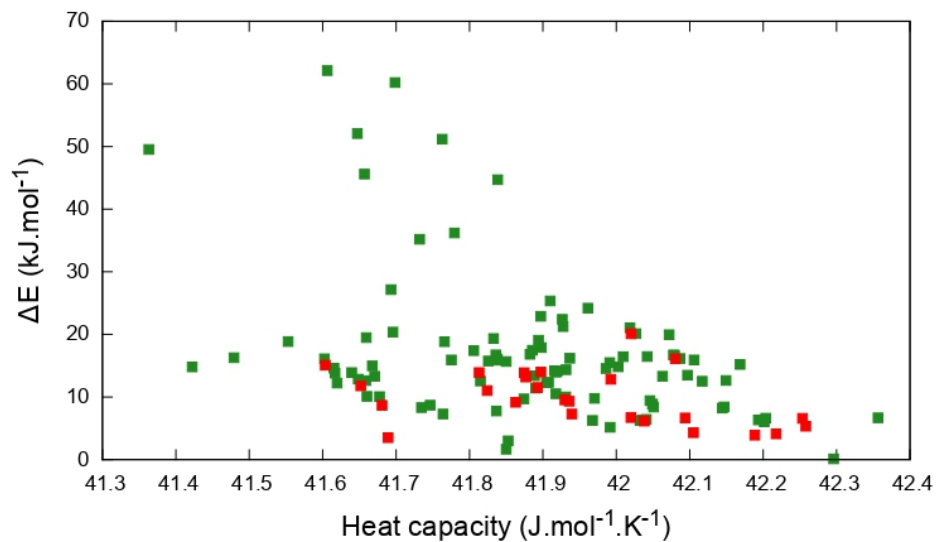

Figure S1: Relative energy with respect to  $\alpha$ -quartz ( $\Delta E$  per  $\text{SiO}_2$  unit) plotted against the heat capacity, also normalised per  $\text{SiO}_2$  unit. Heat capacity values are given at 300 K. Green squares correspond to theoretical structures and red ones correspond to experimentally synthesized structures.

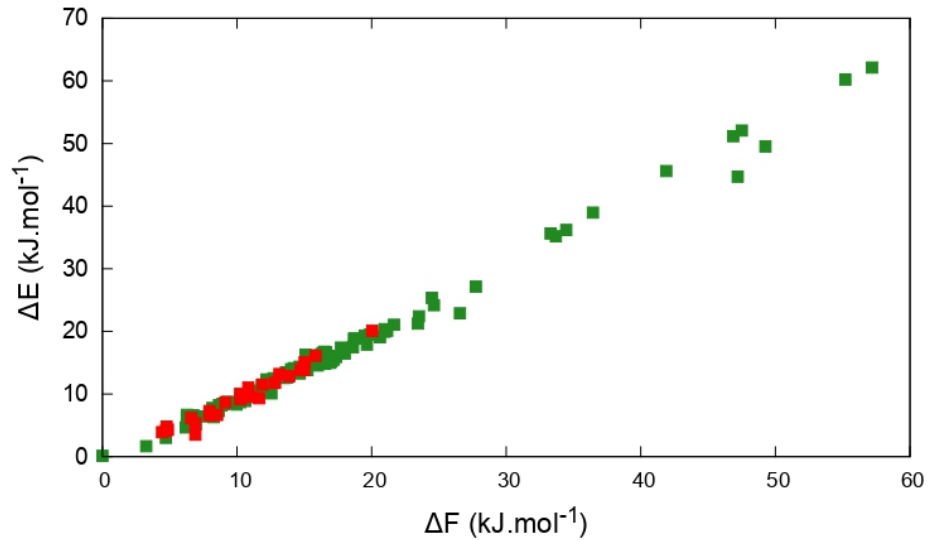

Figure S2: Relative energy with respect to  $\alpha$ -quartz ( $\Delta E$  per  $\text{SiO}_2$  unit) plotted against the free energy, also normalised per  $\text{SiO}_2$  unit. Free energy is given at 300 K. Green squares correspond to theoretical structures and red ones correspond to experimentally synthesized structures.

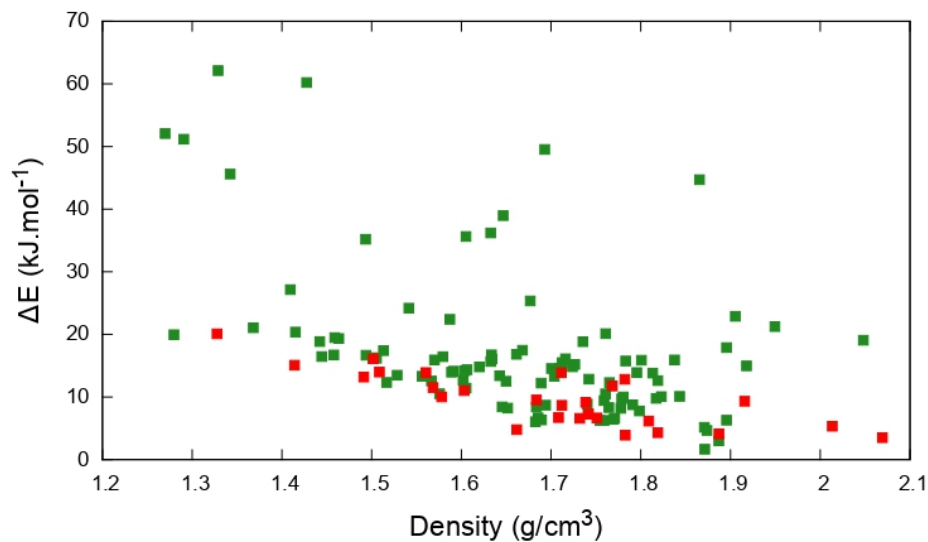

Figure S3: Relative energy with respect to  $\alpha$ -quartz ( $\Delta E$  per  $\text{SiO}_2$  unit) plotted against the density. Green squares correspond to theoretical structures and red ones correspond to experimentally synthesized structures

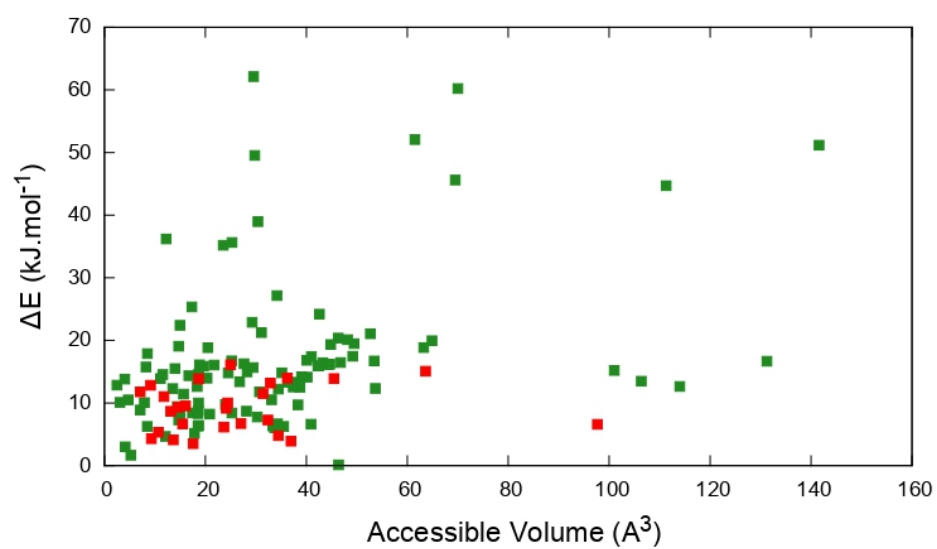

Figure S4: Relative energy with respect to  $\alpha$ -quartz ( $\Delta E$  per  $\text{SiO}_2$  unit) plotted against the accessible volume, also normalised per  $\text{SiO}_2$  unit. Green squares correspond to theoretical structures and red ones correspond to synthesized structures

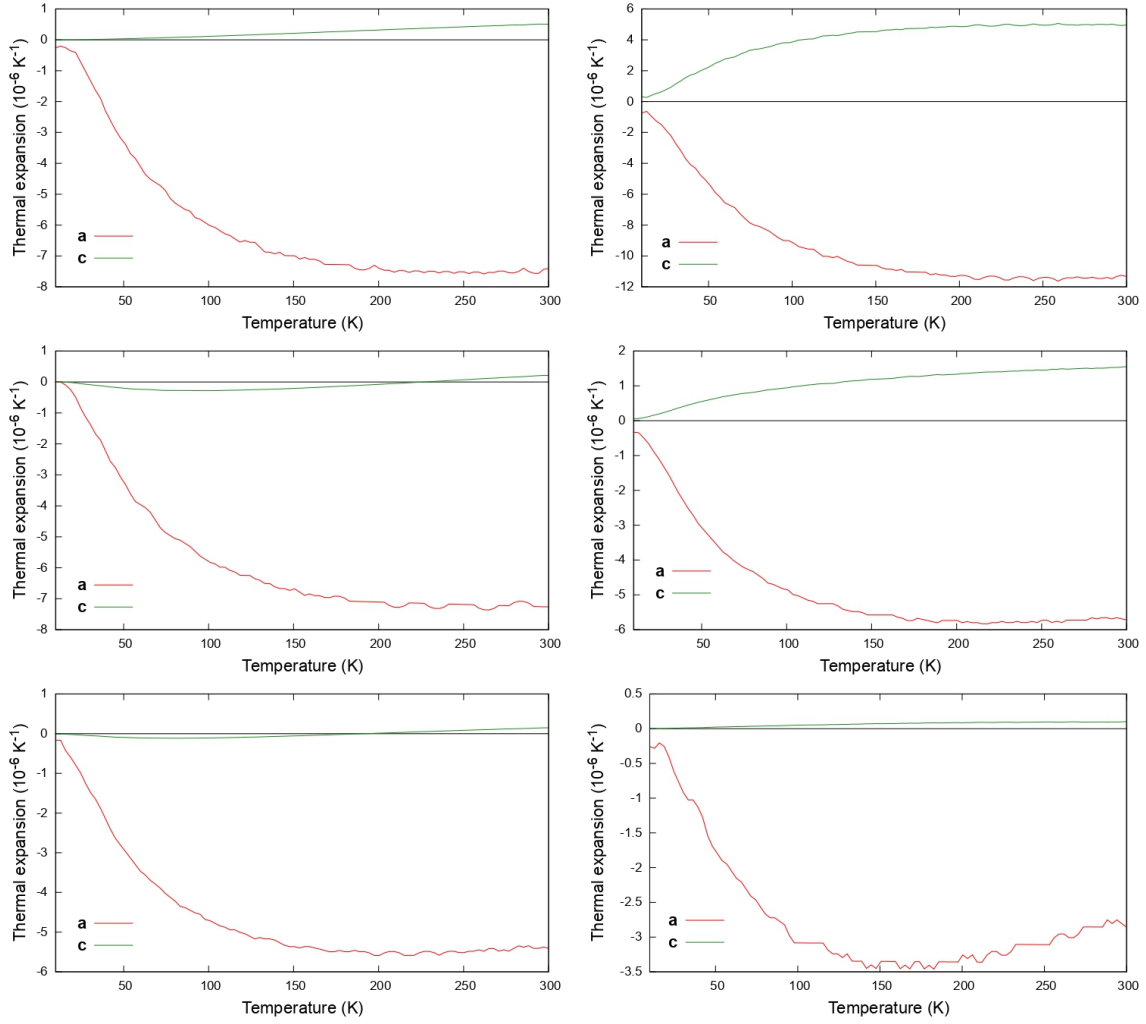

Figure S5: Evolution of the individual lattice parameters thermal expansion coefficients with respect to the temperature for respectively the AFV, AVL and SIV frameworks on the left side and the APC, PHI and UOZ frameworks on the right side.

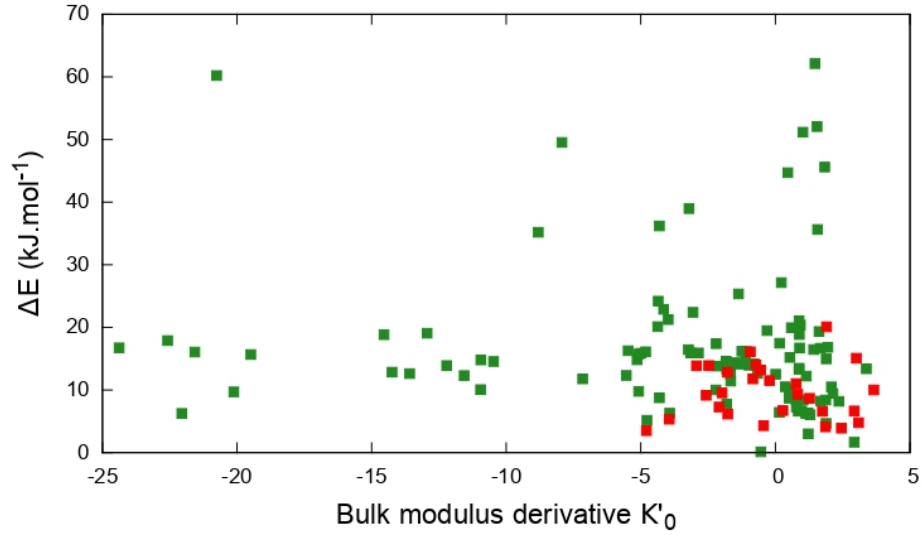

Figure S6: Energy relative to  $\alpha$ -quartz ( $\Delta E$  per  $\text{SiO}_2$  unit) plotted against the pressure-derivative of the bulk modulus  $K'_0$  obtained through the Birch-Murnaghan EOS. Green squares correspond to theoretical structures and red ones correspond to synthesized structures.

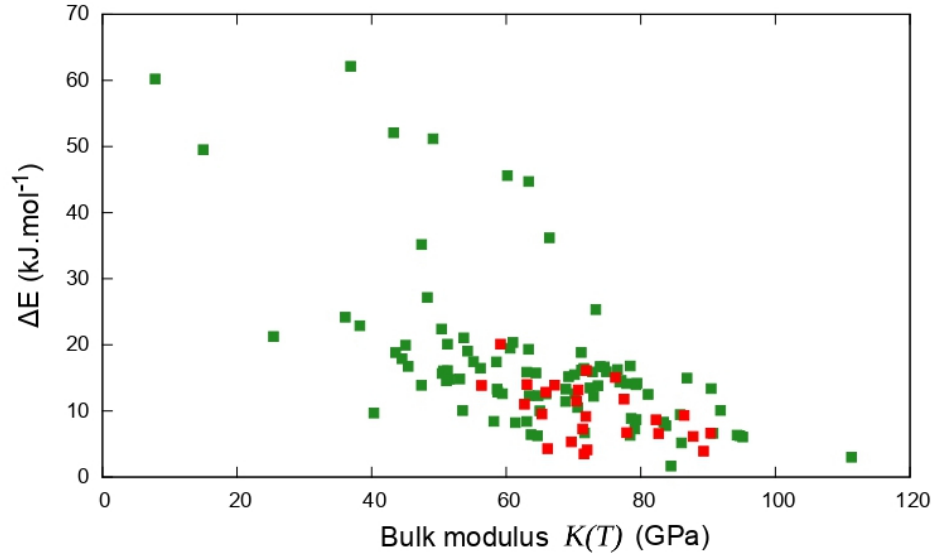

Figure S7:  $\Delta E$  of  $\text{SiO}_2$  unit with the  $\alpha$ -quartz as reference compared to the temperature-dependent bulk modulus  $K(T = 300 \text{ K})$ . Green squares correspond to theoretical structures and red ones correspond to synthesized structures.

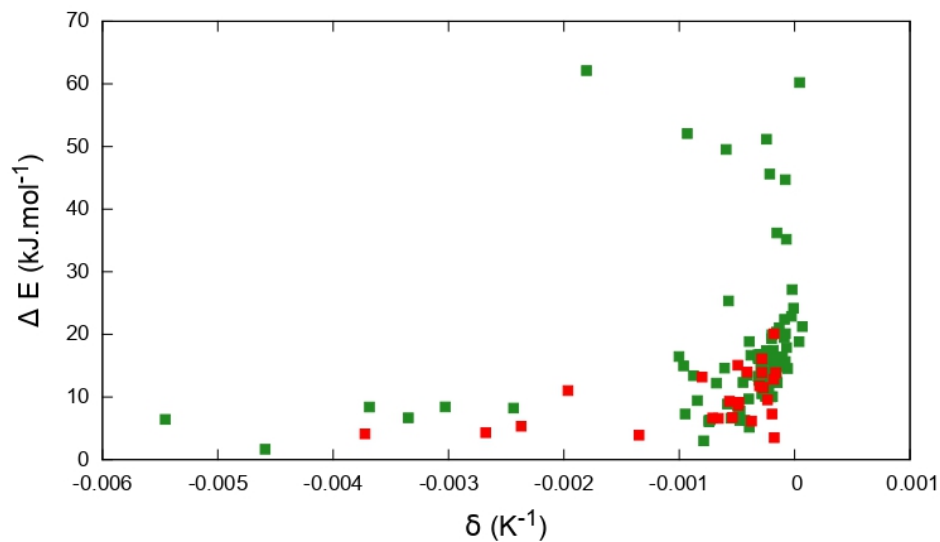

Figure S8:  $\Delta E$  of  $\text{SiO}_2$  unit with the  $\alpha$ -quartz as reference compared to the temperature coefficient of elastic stiffness  $\delta$ . Green squares correspond to theoretical structures and red ones correspond to synthesized structures.

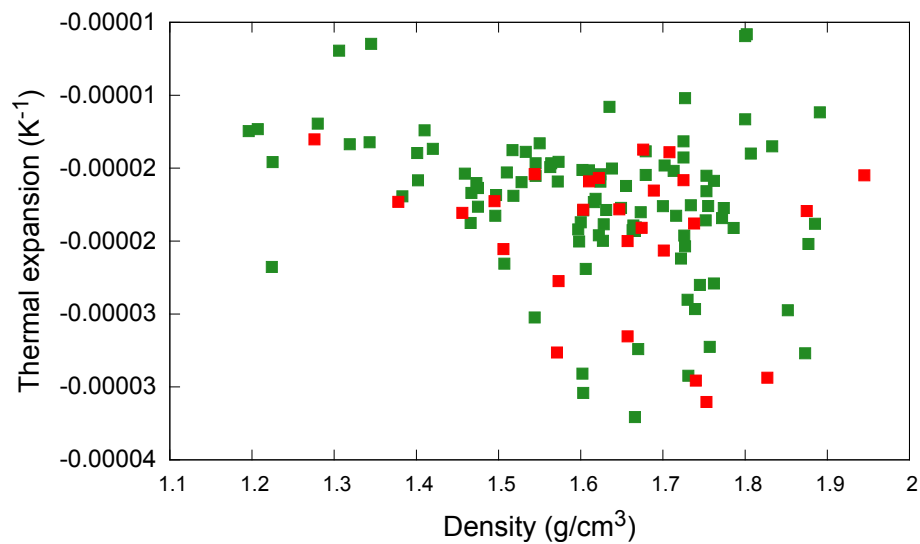

Figure S9: Thermal expansion coefficient plotted against the zeolitic framework density. Green squares correspond to theoretical structures and red ones correspond to synthesized structures.
